# Supplementary material
Source: PubMed Central journal article supplement (PMC2867914)
Supplement: 0914285107_pnas.0914285107_SI.pdf [file 0914285107_pnas.0914285107_SI.pdf]

# Supporting Information

Honkela et al. 10.1073/pnas.0914285107

## SI Text

**Derivation of the Gaussian Process Model.** The linear system of ordinary differential equations underlying our model is

$$\frac{dp(t)}{dt} = f(t) - \delta p(t), \quad [\text{S1}]$$

$$\frac{dm_j(t)}{dt} = B_j + S_j p(t) - D_j m_j(t), \quad [\text{S2}]$$

where  $f(t)$  denotes the TF mRNA,  $p(t)$  the transcription factor (TF) protein and  $m_j(t)$  the target gene mRNA concentration. Assuming steady-state initial conditions  $p(0) = 0$  and  $m_j(0) = B_j/D_j$ , the solution of the system is

$$p(t) = \exp(-\delta t) \int_0^t f(v) \exp(\delta v) dv, \quad [\text{S3}]$$

$$m_j(t) = \frac{B_j}{D_j} + S_j \exp(-D_j t) \int_0^t \exp(D_j u) \exp(-\delta u) \int_0^u f(v) \exp(\delta v) dv du. \quad [\text{S4}]$$

Both of these are linear operators on  $f(t)$ . Hence, placing a Gaussian process prior on  $f(t)$  implies a joint Gaussian process model over all  $\{f(t), p(t), m_j(t)\}$  (1, 2). This Gaussian process is completely characterized by its mean and covariance functions. Assuming  $E[f(t)] = 0$ , the above solutions (Eqs. S3 and S4) imply  $E[p(t)] = 0$ ,  $E[m_j(t)] = B_j/D_j$ .

What remains is to determine the covariance functions. These can be evaluated as expectations

$$k_{xy}(t, t') = E[\{x(t) - E[x(t)]\} \{y(t') - E[y(t')]\}], \quad [\text{S5}]$$

where  $x, y \in \{f, p, m_j\}$ . Assuming the squared exponential covariance\* for  $f(t)$ ,

$$k_{ff}(t, t') = a \exp\left(-\frac{(t-t')^2}{l^2}\right), \quad [\text{S6}]$$

all the required covariance functions can be derived in closed form by repeated application of the identity

$$\int_0^t \exp(Du) \operatorname{erf}(u/l + E) du = \frac{1}{D} \left\{ \exp(Dt) \operatorname{erf}(E + t/l) - \operatorname{erf}(E) + \exp\left[\left(\frac{Dl}{2}\right)^2 - EDl\right] [\operatorname{erf}(E - Dl/2) - \operatorname{erf}(E - Dl/2 + t/l)] \right\}. \quad [\text{S7}]$$

**Covariance function  $k_{fp}$ .** The covariance of the TF mRNA and TF protein  $k_{fp}$  is the same as the cross-covariance derived in ref. 2. In

our model, this is needed only for inference of the protein concentration (such as in Figs. 1 and 2). The covariance is

$$k_{fp}(t, t') = \exp(-\delta t') \int_0^{t'} \exp(\delta u) k_{ff}(t, u) du = \frac{\sqrt{\pi} a l}{2} \exp\left[\left(\frac{\delta l}{2}\right)^2 + \delta(t-t')\right] \left\{ \operatorname{erf}(\delta l/2 + t/l) - \operatorname{erf}[\delta l/2 + (t-t')/l] \right\}. \quad [\text{S8}]$$

**Covariance function  $k_{fm_j}$ .** The covariance of the TF mRNA and target mRNA  $k_{fm_j}$  is

$$k_{fm_j}(t, t') = S_j \exp(-D_j t') \int_0^{t'} \exp[(D_j - \delta)u] \times \int_0^u \exp(\delta v) k_{ff}(t, v) dv du = S_j \frac{\sqrt{\pi} a l}{2(\delta - D_j)} \exp[-(D_j + \delta)t'] \left\{ \exp\left[\left(\frac{D_j l}{2}\right)^2 + D_j t + \delta t'\right] \times \left\{ \operatorname{erf}(D_j l/2 + t/l) - \operatorname{erf}[D_j l/2 + (t-t')/l] \right\} - \exp\left[\left(\frac{\delta l}{2}\right)^2 + \delta t + D_j t'\right] \times \left\{ \operatorname{erf}(\delta l/2 + t/l) - \operatorname{erf}[\delta l/2 + (t-t')/l] \right\} \right\}. \quad [\text{S9}]$$

**Covariance function  $k_{pp}$ .** Again following ref. 2, the covariance of the TF protein  $k_{pp}$  is

$$k_{pp}(t, t') = \exp[-\delta(t+t')] \int_0^t \exp(\delta u) \int_0^{t'} \exp(\delta u') k_{ff}(u, u') du' du = \frac{\sqrt{\pi} a l}{4\delta} \exp\left[\left(\frac{\delta l}{2}\right)^2 - \delta(t+t')\right] [h(t', t) + h(t, t')],$$

where

$$h(t', t) = \exp[2\delta t] \left[ \operatorname{erf}\left(\frac{\delta l}{2} + \frac{t}{l}\right) - \operatorname{erf}\left(\frac{\delta l}{2} + \frac{t-t'}{l}\right) \right] + \left[ \operatorname{erf}\left(\frac{\delta l}{2} + \frac{t'}{l}\right) - \operatorname{erf}\left(\frac{\delta l}{2}\right) \right]. \quad [\text{S10}]$$

This is needed only for inference of the protein concentrations.

**Covariance function  $k_{pm_j}$ .** The covariance of the TF protein and target mRNA  $k_{pm_j}$  is

\*The form used here differs from standard squared exponential by reparametrization  $2l^2 \rightarrow l^2$  that makes the arguments of erfs simpler.

$$\begin{aligned}
& \frac{k_{pm_i}(t,t')}{S_j \exp(-\delta t - D_j t')} \\
&= \int_0^{t'} \exp[(D_j - \delta)u'] \int_0^t \exp(\delta v) \int_0^{u'} \exp(\delta v') k_{ff}(v,v') dv' dv du' \\
&= \frac{\sqrt{\pi} a l}{4\delta} \exp\left[\left(\frac{\delta l}{2}\right)^2\right] \left(\frac{2\delta \exp(-D_j t' - \delta t)}{\delta^2 - D_j^2}\right) [\operatorname{erf}(\delta l/2 - t/l) - \operatorname{erf}(\delta l/2)] \\
&+ \frac{\exp[-\delta(t+t')]}{\delta - D_j} [2\operatorname{erf}(\delta l/2) - \operatorname{erf}(\delta l/2 - t'/l) - \operatorname{erf}(\delta l/2 - t/l)] \\
&+ \frac{\exp[\delta(t-t')]}{\delta + D_j} \{\operatorname{erf}(\delta l/2 + t'/l) - \operatorname{erf}[\delta l/2 - (t-t')/l]\} \\
&+ \frac{\exp[\delta(t-t')]}{\delta - D_j} \{\operatorname{erf}[\delta l/2 + (t-t')/l] - \operatorname{erf}(\delta l/2 + t/l)\} \\
&+ \frac{\sqrt{\pi} l}{2(\delta^2 - D_j^2)} \exp\left[\left(\frac{D_j l}{2}\right)^2 - D_j t' - \delta t\right] \{\operatorname{erf}(D_j l/2 - t'/l) - \operatorname{erf}(D_j l/2) \\
&+ \exp[(D_j + \delta)t] [\operatorname{erf}(D_j l/2 + t/l) - \operatorname{erf}[D_j l/2 + (t-t')/l]]\}. \quad \text{[S11]}
\end{aligned}$$

This is needed only for inference of the protein concentrations.

**Covariance function  $k_{m_j m_k}$ .** The final covariance between target genes  $k_{m_j m_k}$  is

$$\begin{aligned}
k_{m_j m_k}(t,t') &= S_j S_k \exp(-D_j t - D_k t') \int_0^t \exp[(D_j - \delta)u] \\
&\quad \times \int_0^{t'} \exp[(D_k - \delta)u'] \int_0^u \exp(\delta v) \\
&\quad \times \int_0^{u'} \exp(\delta v') k_{ff}(v,v') dv' dv du' du \\
&= \frac{\sqrt{\pi} a l S_j S_k}{2} [h_{jk}(t,t',\delta) + h_{kj}(t',t,\delta) \\
&\quad - h_{jk}(t,t',D_j) - h_{kj}(t',t,D_k)], \quad \text{[S12]}
\end{aligned}$$

where

$$\begin{aligned}
h_{jk}(t,t',D_x) &= \exp\left[\left(\frac{D_x l}{2}\right)^2\right] \frac{\exp(-D_x t - D_k t')}{(D_x + \delta)(D_j - \delta)} \\
&\quad \times \left[\left(\frac{\exp[(D_k - \delta)t'] - 1}{D_k - \delta} + \frac{1}{D_k + D_x}\right) [\operatorname{erf}(D_x l/2 - t/l) \right. \right. \\
&\quad \left. \left. - \operatorname{erf}(D_x l/2)\right] + \frac{\exp[(D_k + D_x)t']}{D_k + D_x} \{\operatorname{erf}(D_x l/2 + t'/l) \right. \right. \\
&\quad \left. \left. - \operatorname{erf}[D_x l/2 - (t-t')/l]\right]\}. \quad \text{[S13]}
\end{aligned}$$

**Gaussian Process Inference.** Denoting all the observations of replicate  $r$  by  $\mathbf{y}_r$ , and a diagonal matrix with their measurement variance parameters by  $\Sigma_r = \operatorname{diag}(\sigma_{1f}^2, \dots, \sigma_{nf}^2, \{\sigma_{1jm}^2, \dots, \sigma_{njm}^2\})$ , the full kernel is  $K_r = K + \Sigma_r$ , where  $K$  can be evaluated using the above formulas.

Based on standard Gaussian process regression (1), the posterior distribution of a vector  $\mathbf{x}$  consisting of values of  $f, p$  and  $m_j$ , not necessarily at times of observations, is Gaussian with

$$\mathbf{x} | \mathbf{y}_r \sim \mathcal{N}(\boldsymbol{\mu}_x + K_{xy} K_r^{-1} (\mathbf{y}_r - \boldsymbol{\mu}_y), K_{xx} - K_{xy} K_r^{-1} K_{yx}), \quad \text{[S14]}$$

where  $\boldsymbol{\mu}_x$  and  $\boldsymbol{\mu}_y$  are the means of  $\mathbf{x}$  and  $\mathbf{y}$ , respectively.  $K_{xy}$  and  $K_{xx}$  can again be evaluated using the above formulas.

1. Rasmussen CE, Williams, CKI (2006) *Gaussian Processes for Machine Learning* (MIT Press, Cambridge, MA).

2. Lawrence ND, Sanguinetti G, Rattray M (2007) *Advances in Neural Information Processing Systems*, eds Schölkopf B, Platt JC, Hofmann T (MIT Press, Cambridge, MA), Vol 19, pp 785–792.

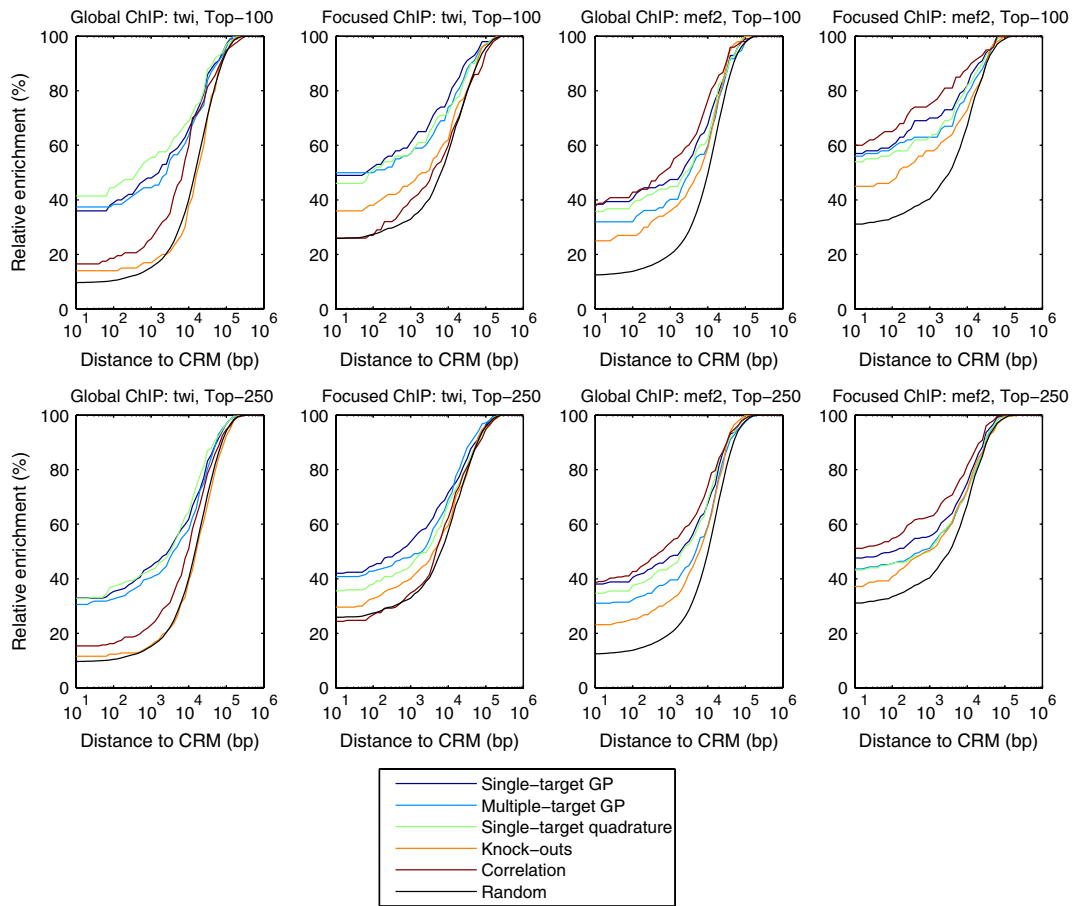

**Fig. S1.** The fraction of top 100 and top 250 predicted targets having a ChIP-chip binding site (*cis*-regulatory module, CRM) within  $x$  base pairs as a function of  $x$  in the different ChIP-chip evaluations used in the paper. Binding sites within an intron of a gene are considered to have a distance 0.

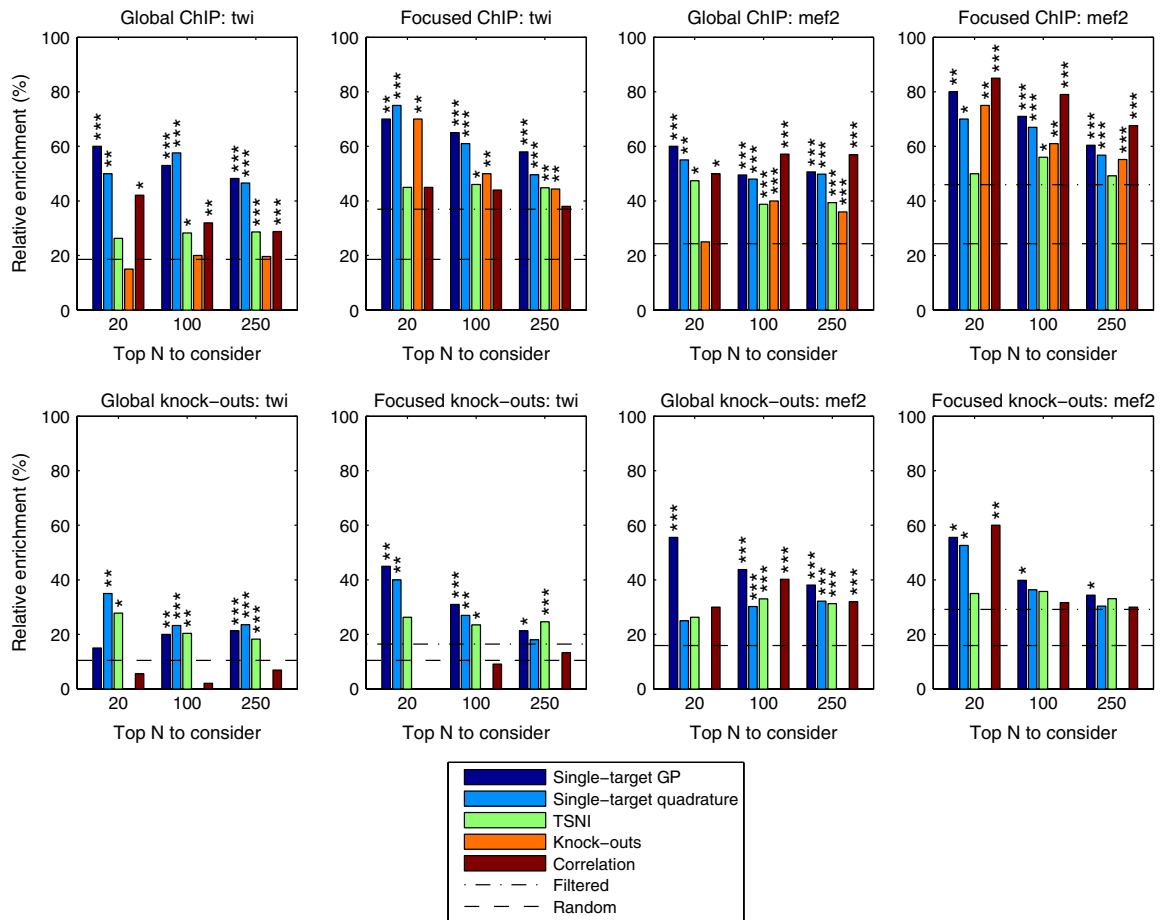

**Fig. S2.** Evaluation results of different rankings including a variant of the TSNI (time series network identification) method of Della Gatta et al. (1) using TF expression levels as a proxy for TF protein measurements. The plots show the relative frequency of positive predictions among  $N$  top-ranking targets, similar to Fig. 3 in the main text. The dashed line denotes the frequency in the full population and the dash-dotted line within the population considered in the focused evaluation. The first row shows the frequency of targets with ChIP-chip binding within 2,000 base pairs of the gene, whereas the second row shows the frequency of predicted targets with significant differential expression in TF knockouts.  $p$  values of results statistically significantly different from random are denoted by \*\*\*:  $p < 0.001$ , \*\*:  $p < 0.01$ , \*:  $p < 0.05$ . Comparison to knockout ranking is obviously omitted for knockout validation.

1. Della Gatta G, et al. (2008) Direct targets of the TRP63 transcription factor revealed by a combination of gene expression profiling and reverse engineering. *Genome Res* 18:939–948.

**Table S1. The results of 100,000-fold bootstrap resampling of the dataset of observed genes to assess statistical significance of differences in ranking method performance**

| Twist global ChIP-chip  |    |    |     |     |  |         |    |     |     |     |  |         |     |     |     |     |  |  |     |
|-------------------------|----|----|-----|-----|--|---------|----|-----|-----|-----|--|---------|-----|-----|-----|-----|--|--|-----|
| Top 20                  |    |    |     |     |  | Top 100 |    |     |     |     |  | Top 250 |     |     |     |     |  |  |     |
| ST                      | MT | QR | CO  | KO  |  | ST      | MT | QR  | CO  | KO  |  | ST      | MT  | QR  | CO  | KO  |  |  |     |
| ST                      | *  | .  | +   | *** |  | ST      | *  | .   | *** | *** |  | ST      | **  | .   | *** | *** |  |  |     |
| MT                      |    |    |     | **  |  | MT      |    |     | *** | *** |  | MT      |     |     | *** | *** |  |  |     |
| QR                      |    |    | .   | **  |  | QR      | +  | .   | *** | *** |  | QR      | +   | .   | *** | *** |  |  |     |
| CO                      |    |    |     | *   |  | CO      |    |     |     | **  |  | CO      |     |     |     |     |  |  | *** |
| KO                      |    |    |     |     |  | KO      |    |     |     |     |  | KO      |     |     |     |     |  |  |     |
| Twist global knockouts  |    |    |     |     |  |         |    |     |     |     |  |         |     |     |     |     |  |  |     |
| Top 20                  |    |    |     |     |  | Top 100 |    |     |     |     |  | Top 250 |     |     |     |     |  |  |     |
| ST                      | MT | QR | CO  | KO  |  | ST      | MT | QR  | CO  | KO  |  | ST      | MT  | QR  | CO  | KO  |  |  |     |
| ST                      |    | +  | *   | -   |  | ST      | .  | .   | *** | -   |  | ST      | *   | .   | *** | -   |  |  |     |
| MT                      |    |    | .   | -   |  | MT      |    |     | *** | -   |  | MT      |     |     | *** | -   |  |  |     |
| QR                      | ** | ** | *** | -   |  | QR      | .  | +   | *** | -   |  | QR      | .   | *   | *** | -   |  |  |     |
| CO                      |    |    |     | -   |  | CO      |    |     |     | -   |  | CO      |     |     |     | -   |  |  |     |
| KO                      | -  | -  | -   | -   |  | KO      | -  | -   | -   | -   |  | KO      | -   | -   | -   | -   |  |  |     |
| Twist focused ChIP-chip |    |    |     |     |  |         |    |     |     |     |  |         |     |     |     |     |  |  |     |
| Top 20                  |    |    |     |     |  | Top 100 |    |     |     |     |  | Top 250 |     |     |     |     |  |  |     |
| ST                      | MT | QR | CO  | KO  |  | ST      | MT | QR  | CO  | KO  |  | ST      | MT  | QR  | CO  | KO  |  |  |     |
| ST                      |    | .  | *   | -   |  | ST      | +  | .   | *** | **  |  | ST      | *** | *** | *** | *** |  |  |     |
| MT                      |    |    | +   | -   |  | MT      |    |     | *** | *   |  | MT      |     |     | *** | *   |  |  |     |
| QR                      |    | .  | *** | .   |  | QR      |    |     | *** | **  |  | QR      |     |     | *** | *   |  |  |     |
| CO                      |    |    |     | -   |  | CO      |    |     |     | -   |  | CO      |     |     |     | -   |  |  |     |
| KO                      |    |    | +   | -   |  | KO      |    |     | +   | -   |  | KO      |     |     |     | **  |  |  |     |
| Twist focused knockouts |    |    |     |     |  |         |    |     |     |     |  |         |     |     |     |     |  |  |     |
| Top 20                  |    |    |     |     |  | Top 100 |    |     |     |     |  | Top 250 |     |     |     |     |  |  |     |
| ST                      | MT | QR | CO  | KO  |  | ST      | MT | QR  | CO  | KO  |  | ST      | MT  | QR  | CO  | KO  |  |  |     |
| ST                      |    | .  | *** | -   |  | ST      | *  | +   | *** | -   |  | ST      | *   | **  | *** | -   |  |  |     |
| MT                      |    |    | *** | -   |  | MT      |    |     | *** | -   |  | MT      |     |     | *** | -   |  |  |     |
| QR                      |    |    | *** | -   |  | QR      | .  |     | *** | -   |  | QR      |     |     | **  | -   |  |  |     |
| CO                      |    |    |     | -   |  | CO      |    |     |     | -   |  | CO      |     |     |     | -   |  |  |     |
| KO                      | -  | -  | -   | -   |  | KO      | -  | -   | -   | -   |  | KO      | -   | -   | -   | -   |  |  |     |
| Mef2 global ChIP-chip   |    |    |     |     |  |         |    |     |     |     |  |         |     |     |     |     |  |  |     |
| Top 20                  |    |    |     |     |  | Top 100 |    |     |     |     |  | Top 250 |     |     |     |     |  |  |     |
| ST                      | MT | QR | CO  | KO  |  | ST      | MT | QR  | CO  | KO  |  | ST      | MT  | QR  | CO  | KO  |  |  |     |
| ST                      |    | .  | .   | **  |  | ST      | +  | .   | .   | +   |  | ST      | *** | .   | .   | *** |  |  |     |
| MT                      |    |    |     | **  |  | MT      |    |     |     | .   |  | MT      |     |     |     | .   |  |  | *   |
| QR                      |    |    |     | *   |  | QR      |    |     |     | +   |  | QR      |     | *** |     | +   |  |  | *** |
| CO                      |    |    |     | *   |  | CO      | *  | **  | *   | *** |  | CO      | **  | *** | **  | *** |  |  | *** |
| KO                      |    |    |     |     |  | KO      |    |     |     |     |  | KO      |     |     |     |     |  |  | *** |
| Mef2 global knockouts   |    |    |     |     |  |         |    |     |     |     |  |         |     |     |     |     |  |  |     |
| Top 20                  |    |    |     |     |  | Top 100 |    |     |     |     |  | Top 250 |     |     |     |     |  |  |     |
| ST                      | MT | QR | CO  | KO  |  | ST      | MT | QR  | CO  | KO  |  | ST      | MT  | QR  | CO  | KO  |  |  |     |
| ST                      |    | *  | *   | -   |  | ST      | +  | *** |     | -   |  | ST      |     | **  | **  | -   |  |  |     |
| MT                      |    | *  | *   | -   |  | MT      |    | **  |     | -   |  | MT      |     | **  | *   | -   |  |  |     |
| QR                      |    |    |     | -   |  | QR      |    |     |     | -   |  | QR      |     | **  | *   | -   |  |  |     |
| CO                      |    |    |     | -   |  | CO      |    | *   |     | -   |  | CO      |     |     |     | -   |  |  |     |
| KO                      | -  | -  | -   | -   |  | KO      | -  | -   | -   | -   |  | KO      | -   | -   | -   | -   |  |  |     |
| Mef2 focused ChIP-chip  |    |    |     |     |  |         |    |     |     |     |  |         |     |     |     |     |  |  |     |
| Top 20                  |    |    |     |     |  | Top 100 |    |     |     |     |  | Top 250 |     |     |     |     |  |  |     |
| ST                      | MT | QR | CO  | KO  |  | ST      | MT | QR  | CO  | KO  |  | ST      | MT  | QR  | CO  | KO  |  |  |     |
| ST                      |    | +  | .   |     |  | ST      | *  | *   |     | **  |  | ST      | **  | **  |     | *   |  |  |     |
| MT                      |    | *  | .   |     |  | MT      |    |     |     | .   |  | MT      |     |     |     | .   |  |  |     |
| QR                      |    |    |     |     |  | QR      |    |     |     | .   |  | QR      |     |     |     | .   |  |  |     |
| CO                      |    |    |     |     |  | CO      | *  | **  | *** | *** |  | CO      | *** | *** | *** | *** |  |  | *** |
| KO                      |    |    |     |     |  | KO      |    |     |     |     |  | KO      |     |     |     |     |  |  |     |
| Mef2 focused knockouts  |    |    |     |     |  |         |    |     |     |     |  |         |     |     |     |     |  |  |     |
| Top 20                  |    |    |     |     |  | Top 100 |    |     |     |     |  | Top 250 |     |     |     |     |  |  |     |
| ST                      | MT | QR | CO  | KO  |  | ST      | MT | QR  | CO  | KO  |  | ST      | MT  | QR  | CO  | KO  |  |  |     |
| ST                      |    | +  | .   | -   |  | ST      | .  | .   | **  | -   |  | ST      | **  | *   | *   | -   |  |  |     |
| MT                      |    |    |     | -   |  | MT      | *  | *** | *** | -   |  | MT      |     | *** | *   | -   |  |  |     |
| QR                      |    |    |     | -   |  | QR      |    |     | +   | -   |  | QR      |     |     |     | -   |  |  |     |
| CO                      |    |    |     | -   |  | CO      |    |     |     | -   |  | CO      |     |     |     | -   |  |  |     |
| KO                      | -  | -  | -   | -   |  | KO      | -  | -   | -   | -   |  | KO      | -   | -   | -   | -   |  |  |     |

The methods studied are ST, single-target GP method; MT, multiple-target GP method; QR, single-target quadrature method; CO, ranking by correlation; KO, ranking by  $q$  value in knockouts. For each pair of methods, the marks in the tables show how often the method on the corresponding row dominated the one on the corresponding column. The marks are interpreted as follows: .: >70% dominance, +: >80% dominance, \*: >90% dominance, \*\*: >95% dominance, \*\*\*: >99% dominance, -: comparison not applicable.
